# Supplementary material for: Co-delivery of hydrophilic gemcitabine and hydrophobic paclitaxel into novel polymeric micelles for cancer treatment
Source: Royal Society of Chemistry journal article supplement (doi:10.1039/c7ra02909h), 2017-01-01
Supplement: c7ra02909h1.pdf [file c7ra02909h1.pdf]

## Supplementary Information

### Co-delivery of Hydrophilic Gemcitabine and Hydrophobic Paclitaxel into Novel Polymeric Micelles for Cancer Treatment

Yan Di<sup>a</sup>, Yunyun Gao<sup>a</sup>, Xiumei Gai<sup>a</sup>, Dun Wang<sup>b</sup>, Yingying Wang<sup>a</sup>,  
Xiaoguang Yang<sup>b</sup>, Dan Zhang<sup>c</sup>, Weisan Pan<sup>a</sup>, Xinggang Yang<sup>a\*</sup>

<sup>a</sup>Department of Pharmaceutics, School of Pharmacy, Shenyang Pharmaceutical University, Wenhua Road, Shenyang, 110016, China

<sup>b</sup>Key Laboratory of Structure-Based Drug Design and Discovery, Ministry of Education, Shenyang Pharmaceutical University, Shenyang, 110016, China

<sup>c</sup>Liaoning Pharma-union Pharmaceutical Co. Ltd., 122A Xianghuai Road, Benxi Economic Development Zone, Benxi, 117000, Liaoning Province

#### Corresponding Author:

Xinggang Yang, Email: [yangxg123@163.com](mailto:yangxg123@163.com)

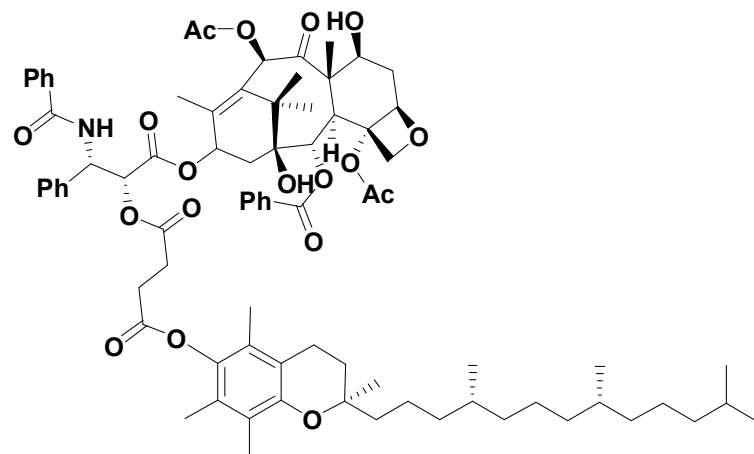

PTX-VE

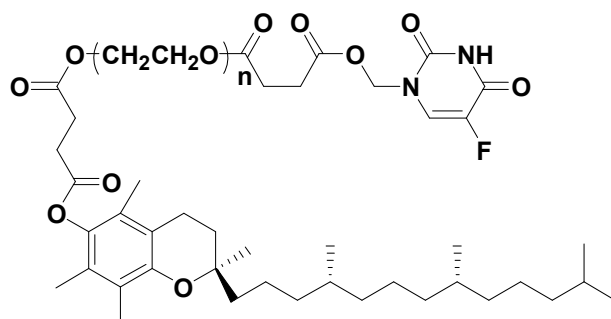

SRB-VE

Fig S1. Chemical structure of PTX-VE and SRB-VE

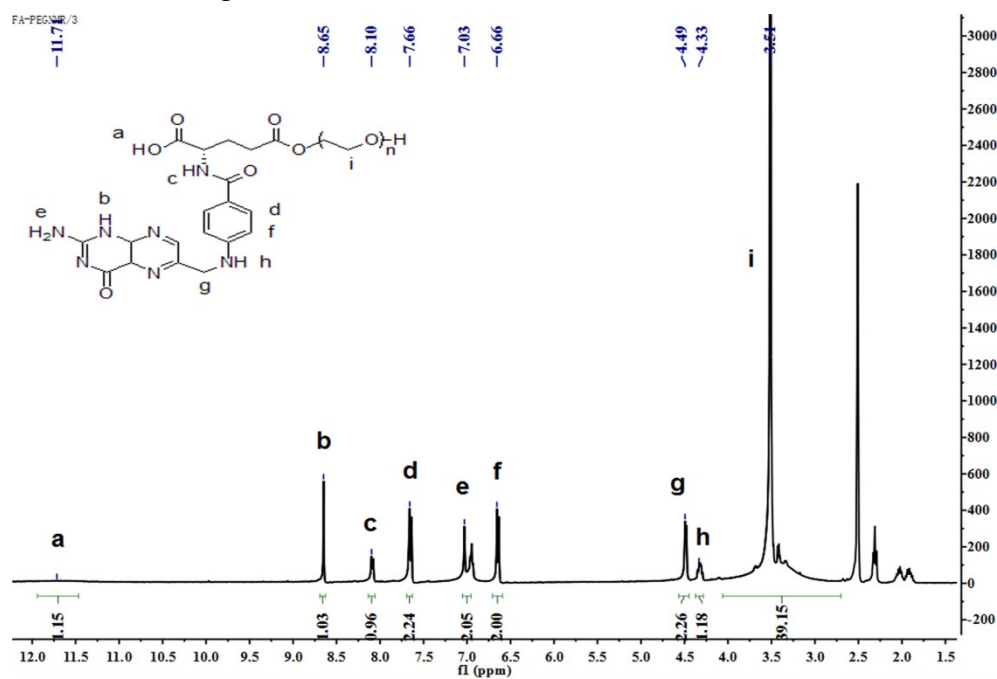

Fig S2. <sup>1</sup>H-NMR spectrum of FA-PEG

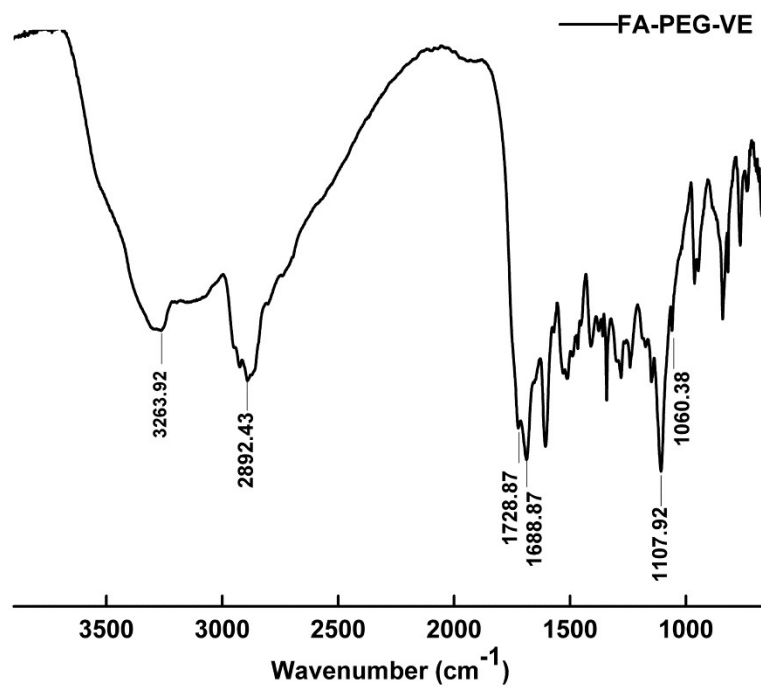

Fig S3. FTIR spectra of FA-PEG-VE

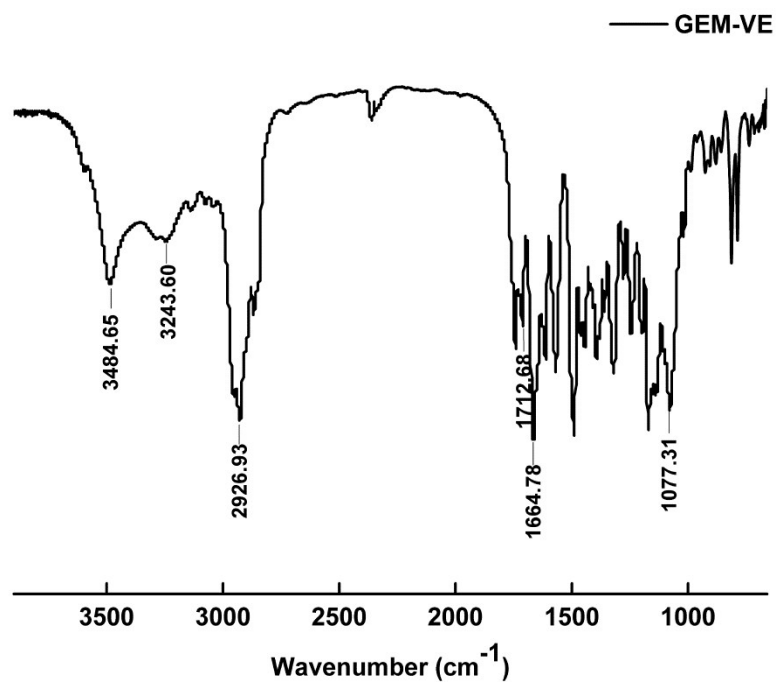

Fig S4. FTIR spectra of GEM-VE

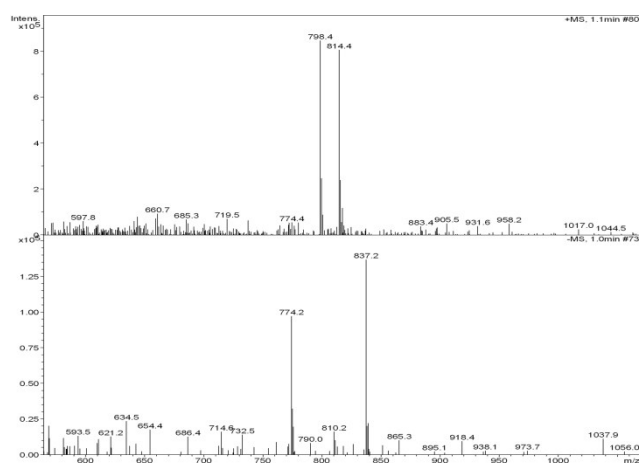

Fig S5. Mass spectra of GEM-VE

Table S1. Fluorescence intensity ( $I_1/I_3$ ) ratio of pyrene in different concentrations of MPEG-PLGA and FA-PEG-VE

| Concentration of materials (g/L) | MPEG-PLGA |           |           | FA-PEG-VE |           |           |
|----------------------------------|-----------|-----------|-----------|-----------|-----------|-----------|
|                                  | $I_1/I_3$ | $I_1/I_3$ | $I_1/I_3$ | $I_1/I_3$ | $I_1/I_3$ | $I_1/I_3$ |
| $1 \times 10^{-6}$               | 1.103     | 1.075     | 1.045     | 1.033     | 1.005     | 0.983     |
| $1 \times 10^{-5}$               | 1.287     | 1.190     | 1.260     | 1.196     | 1.117     | 1.045     |
| $5 \times 10^{-5}$               | 1.390     | 1.378     | 1.350     | 1.218     | 1.164     | 1.100     |
| $1 \times 10^{-4}$               | 1.433     | 1.410     | 1.424     | 1.136     | 1.180     | 1.077     |
| $2 \times 10^{-4}$               | 1.489     | 1.469     | 1.453     | 1.099     | 1.010     | 1.055     |
| $5 \times 10^{-4}$               | 1.340     | 1.371     | 1.372     | 0.962     | 0.920     | 0.869     |
| $1 \times 10^{-3}$               | 1.205     | 1.198     | 1.228     | 0.815     | 0.829     | 0.799     |
